# Supplementary material
Source: publisher figshare collection journal article supplement (https://karger.figshare.com/ndownloader/files/30904531)
Supplement: Supplementary file 1 [file 30904531]

|  |  |
| --- | --- |
| DR2X 3F tgagaattgtactcattcatgttgg | DR2X 11F aggaacagggtctacctcca |
| DR2X 3R gtagtccctcttggcagctt | DR2X 11R aaatgtttgcaatttgcctttt |
|  |  |
| DR2X 4F tcttattccttgttcaatattcagtg | DR2X 12F tgggagagctgagtttaagaaga |
| DR2X 4R cccctagggtcaggaatctg | DR2X 12R gcagagactaaaaatagatgcaatga |
|  |  |
| DR2X 5F cagctgcttgcctgtgaac | DR2X 13F gccctcctctcagagttcct |
| DR2X 5R cacacagaaaacctgtacccttc | DR2X 13R gtgaatccacctctggaagg |
|  |  |
| DR2X 6F gtggtggggtgaagaaaagt | DR2X 14F ggaaatgcccagcaagagta |
| DR2X 6R tccctttctgatttgattgc | DR2X 14R gctcactgaccttcccatct |
|  |  |
| DR2X 7F cgctgtgcaagcttataccc | DR2X 15F ataggccttggtgtgcattc |
| DR2X 7R ttgattgattattgatcccaaga | DR2X 15R actgacttcccccaccatc |
|  |  |
| DR2X 8F gagtgaagatgccgggtaaa | DR2X 16F gaatgttgagctttcaacccta |
| DR2X 8R tgaactggcatcagcctaga | DR2X 16R agcccacaagccagttgtta |
|  |  |
| DR2X 9F tactgagttggctggcactg | DR2X 17F agaattccttgcctgtggtg |
| DR2X 9R tgagaagttctgggcatgtg | DR2X 17R agtgacaaagactaacacctgga |
|  |  |
| DR2X 10F tcactaaattgatcttgtaatgtgc | DR2X 18F caaatcaaaccatgatgcaaa |
| DR2X 10R ccagggctactcttcatcca | DR2X 18R tgtccagatggagtggcata |
|  |  |

**Supplementary Table:** Spondylo-meta-epiphyseal dysplasia [SMED], *DDR2 Gene* Primers
